# Supplementary material
Source: ML conference proceedings conference paper supplement (https://proceedings.neurips.cc/paper_files/paper/2020/hash/6ef1173b096aa200158bfbc8af3ae8e3-Abstract.html)
Supplement: Supplementary file [file 6ef1173b096aa200158bfbc8af3ae8e3-Supplemental.pdf]

## 7 Appendix

In this section we provide a detailed proof for the main theorem. First we state some facts about the learning rate and the algorithm.

**Lemma 7** (Lemma 4.1 from Jin et al. (2018)). *Let  $\alpha_t^i := \alpha_i \prod_{j=i+1}^t (1 - \alpha_j)$ . Then for every  $i \geq 1$ :*

$$\sum_{t=i}^{\infty} \alpha_t^i = 1 + \frac{1}{H}.$$

**Lemma 8** (Lemma 5.4 from Sinclair et al. (2019)). *For any  $h \in [H]$  and ball  $B \in \mathcal{P}_h^K$  the number of time  $B$  is selected is bounded by*

$$|\{k : B_h^k = B\}| \leq \frac{3}{4} \left( \frac{d_{max}}{r(B)} \right)^2$$

*Moreover, the number of times that ball  $B$  and its ancestors have been played is at least  $\frac{1}{4} \left( \frac{d_{max}}{r(B)} \right)^2$ .*

To bound the regret, our starting point is an upper bound on the difference between the optimistic  $Q$ -function and the optimal  $Q^*$  function.

**Lemma 9** (Lemma E.7 from Sinclair et al. (2019)). *For any  $\delta \in (0, 1)$  if  $\beta_t = 2 \sum_{i=1}^t \alpha_t^i b(i)$  then*

$$\beta_t \leq 8 \sqrt{\frac{H^3 \log(4HK/\delta)}{t}} + 16 \frac{Ld_{max}}{\sqrt{t}}$$

*With probability at least  $1 - \delta/2$  the following holds simultaneously for all  $(x, a, h, k) \in \mathcal{S} \times \mathcal{A} \times [H] \times [K]$  and ball  $B$  such that  $(x, a) \in \text{dom}_h^k(B)$ .  $t = n_h^k(B)$  and  $k_1 < \dots < k_t$  are the episodes where  $B$  or its ancestors were encountered previously by the algorithm.*

$$0 \leq Q_h^k(B) - Q_h^*(x, a) \leq \mathbf{1}_{[t=0]}H + \beta_t + \sum_{i=1}^t \alpha_t^i (V_{h+1}^{k_i} - V_{h+1}^*)(x_{h+1}^{k_i})$$

This bound contains three parts. The first is an upper bound for the first step when there is no data. The second term,  $\beta_t$ , is the surplus that we add to be optimistic. The third part is an ‘‘average’’ of the estimated future regret. The key observation is that when  $\beta_t$  is small, it can be absorbed into the future surplus. So we can clip  $\beta_t$  proportional to the future regret, or gap. This enables a gap dependent regret bound.

**Lemma 10** (Clipped upper bound). *For any  $\delta \in (0, 1)$  if  $\beta_t = 2 \sum_{i=1}^t \alpha_t^i b(i)$ . With probability at least  $1 - \delta/2$ ,  $\forall h \in [H], k \in [K]$ ,*

$$\begin{aligned} Q_h^k(B_h^k) - Q_h^*(x_h^k, a_h^k) &\leq \left(1 + \frac{1}{H}\right) \left( \mathbf{1}_{[t=0]}H + \sum_{i=1}^t \alpha_t^i (V_{h+1}^{k_i} - V_{h+1}^*)(x_{h+1}^{k_i}) \right) \\ &\quad + \text{clip} [\beta_t \mid \text{gap}_h(x_h^k, a_h^k)/(H + 1)] \end{aligned}$$

*Proof.* We use  $a_h^* : \mathcal{X} \rightarrow \mathcal{A}$  to denote a mapping from the state to the optimal action at stage  $h$ . By the definition of the gap

$$\begin{aligned} \text{gap}_h(x_h^k, a_h^k) &= Q_h^*(x_h^k, a_h^*(x_h^k)) - Q_h^*(x_h^k, a_h^k) \leq Q_h^k(B_h^{k*}) - Q_h^*(x_h^k, a_h^k) \\ &\leq Q_h^k(B_h^k) - Q_h^*(x_h^k, a_h^k) \leq \mathbf{1}_{[t=0]}H + \beta_t + \sum_{i=1}^t \alpha_t^i (V_{h+1}^{k_i} - V_{h+1}^*)(x_{h+1}^{k_i}), \end{aligned}$$

where  $B_h^{k*}$  is the smallest ball that contains  $(x_h^k, a_h^*(x_h^k))$ . The first inequality is by the lower bound of Lemma 9. Note that  $B_h^{k*} \in \text{dom}_h^k(x_h^k)$ . The second uses the selection rule of choosing the ball with the largest  $Q_h^k(B)$  for  $B \in \text{dom}_h^k(x_h^k)$ . The third inequality is by the upper bound of Lemma 9.

Now we consider two cases, if  $\beta_t > \text{gap}_h(x_h^k, a_h^k)/(H+1)$ , the bound is trivially implied by Lemma 9. If  $\beta_t \leq \text{gap}_h(x_h^k, a_h^k)/(H+1)$ ,

$$\begin{aligned} \text{gap}_h(x_h^k, a_h^k) &\leq \mathbf{1}_{[t=0]}H + \beta_t + \sum_{i=1}^t \alpha_t^i (V_{h+1}^{k_i} - V_{h+1}^*) (x_{h+1}^{k_i}) \\ &\leq \mathbf{1}_{[t=0]}H + \sum_{i=1}^t \alpha_t^i (V_{h+1}^{k_i} - V_{h+1}^*) (x_{h+1}^{k_i}) + \text{gap}_h(x_h^k, a_h^k)/(H+1) \end{aligned}$$

Taking the gap to one side we have

$$\text{gap}_h(x_h^k, a_h^k) \leq \frac{H+1}{H} \left( \mathbf{1}_{[t=0]}H + \sum_{i=1}^t \alpha_t^i (V_{h+1}^{k_i} - V_{h+1}^*) (x_{h+1}^{k_i}) \right)$$

By Lemma 9 and our assumption

$$\begin{aligned} Q_h^k(B_h^k) - Q_h^*(x_h^k, a_h^k) &\leq \mathbf{1}_{[t=0]}H + \beta_t + \sum_{i=1}^t \alpha_t^i (V_{h+1}^{k_i} - V_{h+1}^*) (x_{h+1}^{k_i}) \\ &< \mathbf{1}_{[t=0]}H + \text{gap}_h(x_h^k, a_h^k)/(H+1) + \sum_{i=1}^t \alpha_t^i (V_{h+1}^{k_i} - V_{h+1}^*) (x_{h+1}^{k_i}) \\ &\leq \left(1 + \frac{1}{H}\right) \left( \mathbf{1}_{[t=0]}H + \sum_{i=1}^t \alpha_t^i (V_{h+1}^{k_i} - V_{h+1}^*) (x_{h+1}^{k_i}) \right). \quad \square \end{aligned}$$

The next step is to replace the future regret to  $V^*$  with the future regret of  $V^{\pi^k}$ , so that we can solve for the  $h=1$  case recursively.

**Lemma 11** (Clipped recursion). *For any  $\delta \in (0, 1)$  if  $\beta_t = 2 \sum_{i=1}^t \alpha_t^i b(i)$ . With probability at least  $1 - \delta/2$ ,  $\forall h \in [H], k \in [K]$ ,*

$$\begin{aligned} \sum_{k=1}^K (V_h^k - V_h^{\pi^k})(x_h^k) &\leq \sum_{k=1}^K \left(1 + \frac{1}{H}\right) \left( H \mathbf{1}_{[n_h^k=0]} + \xi_{h+1}^k + \text{clip} \left[ \beta_{n_h^k} \mid \frac{\text{gap}_h(x_h^k, a_h^k)}{H+1} \right] \right) \\ &\quad + \left(1 + \frac{1}{H}\right)^2 \sum_{k=1}^K (V_{h+1}^k - V_{h+1}^{\pi^k})(x_{h+1}^k), \end{aligned}$$

where  $\xi_{h+1}^k = \mathbb{E} [V_{h+1}^*(x) - V_{h+1}^{\pi^k}(x) \mid x_h^k, a_h^k] - (V_{h+1}^* - V_{h+1}^{\pi^k})(x_{h+1}^k)$ .

*Proof.*

$$\begin{aligned} V_h^k(x_h^k) - V_h^{\pi^k}(x_h^k) &\leq \max_{B \in \text{rel}_h^k(x_h^k)} Q_h^k(B) - Q_h^{\pi^k}(x_h^k, a_x^k) = Q_h^k(B_h^k) - Q_h^{\pi^k}(x_h^k, a_x^k) \\ &= Q_h^k(B_h^k) - Q_h^*(x_h^k, a_h^k) + Q_h^*(x_h^k, a_h^k) - Q_h^{\pi^k}(x_h^k, a_x^k) \\ &= \left(1 + \frac{1}{H}\right) \left( \mathbf{1}_{[t=0]}H + \sum_{i=1}^t \alpha_t^i (V_{h+1}^{k_i} - V_{h+1}^*) (x_{h+1}^{k_i}) \right) + \text{clip} \left[ \beta_t \mid \frac{\text{gap}_h(x_h^k, a_h^k)}{H+1} \right] \\ &\quad + (V_{h+1}^* - V_{h+1}^{\pi^k})(x_{h+1}^k) + \xi_{h+1}^k. \end{aligned}$$

Summing over the episodes, let  $n_h^k = n_h^k(B_h^k)$  and  $k_i(B_h^k)$  be the episode where  $B_h^k$  or its ancestors are sampled for the  $i$ -th time.

$$\begin{aligned} \sum_{k=1}^K V_h^k(x_h^k) - V_h^{\pi^k}(x_h^k) &\leq \sum_{k=1}^K \left(1 + \frac{1}{H}\right) \left( \mathbf{1}_{[t=0]}H + \text{clip}[\beta_t, \frac{\text{gap}_h(x_h^k, a_h^k)}{H+1}] \right) \\ &\quad + \left(1 + \frac{1}{H}\right) \sum_{k=1}^K \sum_{i=1}^{n_h^k} \alpha_{n_h^k}^i (V_{h+1}^{k_i(B_h^k)} - V_{h+1}^*) (x_{h+1}^{k_i(B_h^k)}) \\ &\quad + \sum_{k=1}^K \left( (V_{h+1}^* - V_{h+1}^{\pi^k})(x_{h+1}^k) + \xi_{h+1}^k \right). \end{aligned}$$

Using the observation in Jin et al. (2018); Song and Sun (2019), for the second term we can rearrange the sum and use Lemma 7

$$\begin{aligned} \sum_{k=1}^K \sum_{i=1}^{n_h^k} \alpha_{n_h^k}^i (V_{h+1}^{k_i(B_h^k)} - V_{h+1}^*) (x_{h+1}^{k_i(B_h^k)}) &\leq \sum_{k=1}^K (V_{h+1}^k - V_{h+1}^*) (x_{h+1}^k) \sum_{t=n_h^k}^{\infty} \alpha_t^{n_h^k} \\ &\leq \left(1 + \frac{1}{H}\right) \sum_{k=1}^K (V_{h+1}^k - V_{h+1}^*) (x_{h+1}^k). \end{aligned}$$

Since  $V_{h+1}^{\pi^k}(x_{h+1}^k) \leq V_{h+1}^*(x_{h+1}^k)$ , we have

$$\begin{aligned} &\left(1 + \frac{1}{H}\right)^2 \sum_{k=1}^K (V_{h+1}^k - V_{h+1}^*) (x_{h+1}^k) + \sum_{k=1}^K (V_{h+1}^* - V_{h+1}^{\pi^k}) (x_{h+1}^k) \\ &\leq \left(1 + \frac{1}{H}\right)^2 \left( \sum_{k=1}^K (V_{h+1}^k - V_{h+1}^*) (x_{h+1}^k) + \sum_{k=1}^K (V_{h+1}^* - V_{h+1}^{\pi^k}) (x_{h+1}^k) \right) \\ &= \left(1 + \frac{1}{H}\right)^2 \sum_{k=1}^K (V_{h+1}^k - V_{h+1}^{\pi^k}) (x_{h+1}^k) \end{aligned}$$

So we have

$$\begin{aligned} \sum_{k=1}^K (V_h^k - V_h^{\pi^k}) (x_h^k) &\leq \sum_{k=1}^K \left(1 + \frac{1}{H}\right) \left( H \mathbf{1}_{[n_h^k=0]} + \xi_{h+1}^k + \text{clip} \left[ \beta_{n_h^k} \mid \frac{\text{gap}_h(x_h^k, a_h^k)}{H+1} \right] \right) \\ &\quad + \left(1 + \frac{1}{H}\right)^2 \sum_{k=1}^K (V_{h+1}^k - V_{h+1}^{\pi^k}) (x_{h+1}^k). \quad \square \end{aligned}$$

There are two terms that we need to bound. The  $\xi_{h+1}^k$  term can be bounded by a concentration argument as shown in Sinclair et al. (2019).

**Lemma 12** (Azuma–Hoeffding bound, Lemma E.9 from Sinclair et al. (2019)). *For any  $\delta \in (0, 1)$ , with probability at least  $1 - \delta/2$*

$$\sum_{h=1}^H \sum_{k=1}^K \xi_{h+1}^k \leq 2\sqrt{2H^3 K \log(4HK/\delta)}$$

The clipped  $\beta_t$  term requires a more refined treatment to relate it to the zooming number or zooming dimension. Recall our definition of the near-optimal space

$$\mathcal{P}_{h,r}^{Q^*} = \{(x, a) : \text{gap}_h(x, a) \leq c_1 r\},$$

where  $c_1 = \frac{2(H+1)}{d_{\max}} + 2L$ . Define the stage-dependent zooming number as

$$z_{h,c} = \inf\{d > 0 : |\mathcal{P}_{h,r}^{Q^*}| \leq cr^{-d}\}.$$

The following is our key lemma that bounds surplus  $\beta_t$  using the zooming number.

**Lemma 13.**

$$\begin{aligned} \sum_{h=1}^H \sum_{k=1}^K \text{clip} \left[ \beta_{n_h^k}, \frac{\text{gap}_h(x_h^k, a_h^k)}{H+1} \right] &\leq \sum_{h=1}^H 32(\sqrt{H^3 \log(4HK/\delta)} + Ld_{\max}) \\ &\quad \inf_{r_0 \in (0, d_{\max}]} \left( \sum_{r=d_{\max}2^{-i}, r \geq r_0} N_r^{\text{pack}}(\mathcal{P}_{h,r}^{Q^*}) \frac{d_{\max}}{r} + \frac{Kr_0}{d_{\max}} \right) \end{aligned}$$

*Proof.* Let  $c_2 = 16(\sqrt{H^3 \log(4HK/\delta)} + Ld_{\max})$ . By Lemma 9 we have

$$\beta_{n_h^k} \leq 16(\sqrt{H^3 \log(4HK/\delta)} + Ld_{\max}) \frac{1}{\sqrt{n_h^k}} = c_2 \frac{1}{\sqrt{n_h^k}}$$

Let  $n_{\min}(B) = \frac{1}{4} \left( \frac{d_{\max}}{r(B)} \right)^2$ , and  $n_{\max}(B) = \left( \frac{d_{\max}}{r(B)} \right)^2$ . Considering Lemma 8 and the fact that a ball inherits samples from its parent, we know that for all  $h$  and  $k$ ,

$$n_{\min}(B) \leq n_h^k(B) \leq n_{\max}(B)$$

We rearrange the sum for each ball.

$$\begin{aligned} \sum_{k=1}^K \text{clip} \left[ \beta_{n_h^k} \mid \frac{\text{gap}_h(x_h^k, a_h^k)}{H+1} \right] &\leq \sum_{B \in \mathcal{P}_h^K} \sum_{n=n_{\min}(B)}^{n_{\max}(B)} \text{clip} \left[ c_2 \frac{1}{\sqrt{n}} \mid \frac{\text{gap}_h(B)}{H+1} \right] \\ &\leq c_2 \sum_{B \in \mathcal{P}_h^K} \sum_{n=n_{\min}(B)}^{n_{\max}(B)} \text{clip} \left[ \frac{1}{\sqrt{n}}, \frac{\text{gap}_h(B)}{H+1} \right] \end{aligned}$$

The last step is due to the fact that  $c_2 > 1$  and if  $\frac{c_2}{\sqrt{n}} < \frac{\text{gap}_h(B)}{H+1}$  then  $\frac{1}{\sqrt{n}} < \frac{\text{gap}_h(B)}{H+1}$ . Now, ignoring clipping, the inner sum can be bounded by

$$\sum_{n=n_{\min}(B)}^{n_{\max}(B)} \frac{1}{\sqrt{n}} \leq \int_{i=1}^{\frac{3}{4} \left( \frac{d_{\max}}{r(B)} \right)^2} \frac{1}{\sqrt{i + \frac{1}{4} \left( \frac{d_{\max}}{r(B)} \right)^2}} \leq 2 \frac{d_{\max}}{r(B)}.$$

For clipping, let  $\text{gap}_h(B) = \min_{(x,a) \in B} \text{gap}_h(x, a)$  be the gap for a ball  $B$ . We consider two cases.

**Case 1:**  $\text{gap}_h(B) \geq \frac{2(H+1)r(B)}{d_{\max}}$ , we have

$$\frac{1}{\sqrt{n_h^k(B)}} \leq \frac{1}{\sqrt{n_{\min}(B)}} = \frac{2r(B)}{d_{\max}} \leq \frac{\text{gap}_h(B)}{H+1}$$

So in this case the regret on ball  $B$  is always clipped.

**Case 2:**  $\text{gap}_h(B) < \frac{2(H+1)r(B)}{d_{\max}}$

Let  $(x_c, a_c)$  be the center of  $B$  and  $(x_m, a_m) \in B$  be the point that has the minimum gap, i.e. the point that achieves  $\text{gap}_h(B)$ . Using the assumption that  $Q^*$  and  $V^*$  are Lipschitz:

$$\begin{aligned} \text{gap}_h(x_c, a_c) - \text{gap}_h(B) &= Q_h^*(x_c, a_h^*(x_c)) - Q_h^*(x_c, a_c) - (Q_h^*(x_m, a_h^*(x_m)) - Q_h^*(x_m, a_m)) \\ &\leq 2Lr(B) \end{aligned}$$

So we know that all the points in  $B$  have small gaps relative to  $r$ .

$$\text{gap}_h(x_c, a_c) \leq \text{gap}_h(B) + 2Lr(B) \leq \frac{2(H+1)r(B)}{d_{\max}} + 2Lr(B).$$

Thus, we have  $(x_c, a_c) \in \mathcal{P}_{h,r(B)}^{Q^*}$ . Now we are ready bound the sum. Note that for a ball  $B \in \mathcal{P}_h^K$ , either  $B$  gets clipped, or the center of  $B$  is in  $\mathcal{P}_{h,r(B)}^{Q^*}$ . Since all the balls of radius  $r$  are at least  $r$  apart, we can have at most  $N_r^{\text{pack}}(\mathcal{P}_{h,r}^{Q^*})$  in the latter case.

$$\begin{aligned} \sum_{k=1}^K \text{clip} \left[ \beta_{n_h^k} \mid \frac{\text{gap}_h(x_h^k, a_h^k)}{H+1} \right] &\leq \sum_{B \in \mathcal{P}_h^K} \sum_{n=n_{\min}(B)}^{n_{\max}(B)} \text{clip} \left[ c_2 \frac{1}{\sqrt{n}} \mid \frac{\text{gap}_h(B)}{H+1} \right] \\ &\leq c_2 \inf_{r_0 \in (0, d_{\max}]} \left( \sum_{r=d_{\max}2^{-i}, r \geq r_0} N_r^{\text{pack}}(\mathcal{P}_{h,r}^{Q^*}) \frac{2d_{\max}}{r} + \frac{2Kr_0}{d_{\max}} \right). \end{aligned}$$

The second term uses the fact that for any ball  $B$  with  $r(B) \leq r_0$ , we have  $n_{\min} \leq \frac{1}{4} \left( \frac{d_{\max}}{r_0} \right)^2$ .  $\square$

Now we are ready to prove Theorem 1.

*Proof of Theorem 1.* We apply Lemma 11 recursively.

$$\begin{aligned}
& \sum_{k=1}^K (V_1^k - V_1^{\pi^k})(x_1^k) \\
& \leq (H+1) + \sum_{k=1}^K \left(1 + \frac{1}{H}\right) \left(\xi_2^k + \text{clip} \left[\beta_{n_1^k} \mid \frac{\text{gap}_1(x_1^k, a_1^k)}{H+1}\right]\right) + \left(1 + \frac{1}{H}\right)^2 \sum_{k=1}^K (V_2^k - V_2^{\pi^k})(x_2^k) \\
& \leq \sum_{h=1}^H H \left(1 + \frac{1}{H}\right)^{2h-1} + \sum_{h=1}^H \left(1 + \frac{1}{H}\right)^{2h-1} \sum_{k=1}^K \left(\xi_{h+1}^k + \text{clip} \left[\beta_{n_h^k} \mid \frac{\text{gap}_h(x_h^k, a_h^k)}{H+1}\right]\right) \\
& \leq 9H^2 + 9 \sum_{h=1}^H \sum_{k=1}^K \left(\text{clip} \left[\beta_{n_h^k} \mid \frac{\text{gap}_h(x_h^k, a_h^k)}{H+1}\right] + \xi_{h+1}^k\right)
\end{aligned}$$

Note that  $\sum_{h=1}^H (1 + 1/H)^{2h-1} \leq \sum_{h=1}^H ((1 + 1/H)^H)^2 \leq e^2 H \leq 9H$ . Finally,

$$\begin{aligned}
\sum_{k=1}^K (V_1^k - V_1^{\pi^k})(x_1^k) & \leq 9H^2 + 9 \sum_{h=1}^H \sum_{k=1}^K \left(\text{clip} \left[\beta_{n_h^k} \mid \frac{\text{gap}_h(x_h^k, a_h^k)}{H+1}\right] + \xi_{h+1}^k\right) \\
& \leq 9H^2 + 18\sqrt{2H^3 K \log(4HK/\delta)} + \sum_{h=1}^H 288(\sqrt{H^3 \log(4HK/\delta)} + Ld_{\max}) \\
& \quad \times \inf_{r_0 \in (0, d_{\max}]} \left( \sum_{r=d_{\max}2^{-i}, r \geq r_0} N_r^{\text{pack}}(\mathcal{P}_{h,r}^{Q^*}) \frac{d_{\max}}{r} + \frac{Kr_0}{d_{\max}} \right) \\
& = \tilde{O} \left( H^{3/2} \inf_{r_0 \in (0, d_{\max}]} \left( \sum_{h=1}^H \sum_{r=d_{\max}2^{-i}, r \geq r_0} N_r^{\text{pack}}(\mathcal{P}_{h,r}^{Q^*}) \frac{d_{\max}}{r} + \frac{Kr_0}{d_{\max}} \right) \right) \\
& \quad + \tilde{O} \left( H^2 + \sqrt{H^3 K \log(1/\delta)} \right). \quad \square
\end{aligned}$$
